# Supplementary material for: General Practitioners’ Attitudes towards Essential Competencies in End-of-Life Care: A Cross-Sectional Survey
Source: PubMed Central journal article supplement (PMC5287469; doi:10.1371/journal.pone.0170168), 2017-02-01
Supplement: pone.0170168.s001.pdf [file pone.0170168.s001.pdf]

UNIVERSITÄT BASEL

**Medizinische Fakultät**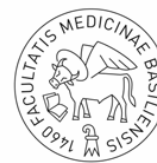

**Betreuung von Patienten/Patientinnen am Lebensende  
(End-of-Life Care) - die Rolle der Hausärzte/Hausärztinnen**

Nationales Forschungsprogramm NFP 67 ([www.nfp67.ch](http://www.nfp67.ch))

Institut für Hausarztmedizin der Universität Basel

Eine Kooperationsstudie in Zusammenarbeit mit allen Schweizerischen Instituten für Hausarztmedizin, Hausärzte Schweiz, dem Institut für Bio- und Medizinethik der Universität Basel, dem Hospiz im Park, Klinik für Palliative Care in Arlesheim, dem Institut für Kooperationsforschung und -entwicklung der FH Nordwestschweiz und dem Schweizerischen Tropen- und Public Health Institut der Universität Basel

Liebe Frau Kollegin, lieber Herr Kollege,

- Bitte antworten Sie der Reihe nach (mit Bleistift, Kugelschreiber oder Tinte) und **lassen Sie möglichst keine Frage aus. Mehrfachantworten sind nur dann möglich, wenn ausdrücklich vermerkt.**
- Falls keine Antwort vollständig zutrifft, antworten Sie bitte so, wie es **am ehesten für Sie stimmt.**
- Es gibt keine richtigen oder falschen Antworten. Nur Ihre **persönliche Meinung und Situation** ist von Interesse.
- **Wenn Sie nicht als Hausarzt/Hausärztin tätig sind**, kreuzen Sie bitte nur die erste Frage an und schicken Sie uns den gesamten Fragebogen ohne die weiteren Fragen zu beantworten im vorfrankierten Rückumschlag zurück.
- Die Auswertung der Daten erfolgt **vollständig anonymisiert**. Eine Zuordnung von Informationen zu einer bestimmten Person wird dem Studienteam nicht möglich sein.
- Bei Unklarheiten wenden Sie sich bitte an die Studienleitung ([klaus.bally@unibas.ch](mailto:klaus.bally@unibas.ch) oder [ina.otte@unibas.ch](mailto:ina.otte@unibas.ch))
- Bitte senden Sie uns den Fragebogen bis zum **31. März 2014** im vorfrankierten Rückumschlag zurück.

**Wir danken Ihnen herzlich für Ihre Mühe und Unterstützung.**

Dr. med. Klaus Bally  
Facharzt für Allgemeine Medizin FMH  
Institut für Hausarztmedizin der Universität Basel  
St. Johannis-Parkweg 2  
CH 4056 Basel  
Tel: ++ 41 61 321 77 44  
Fax: ++ 41 61 321 77 45

Dipl. Soz. Ina Otte  
Institut für Hausarztmedizin und  
Institut für Bioethik der Universität Basel  
Bernoullistr. 28  
CH 4056 Basel  
Tel: ++ 41 61 267 17 82

Um die Formulare elektronisch auswerten zu können, müssen die Kästchen korrekt markiert werden :  
**Richtig:**  falsch:  falsch:  Bitte füllen Sie für **jede Frage** ein Antwortfeld aus.

**Zu Ihrer Person, Praxis und ärztlichen Tätigkeit**

**1. Sind Sie als Hausarzt tätig?**  Ja  Nein

Wenn Sie nicht als Hausarzt/Hausärztin tätig sind, kreuzen Sie bitte nur die erste Frage an und schicken Sie uns den gesamten Fragebogen ohne die weiteren Fragen zu beantworten im vorfrankierten Kuvert zurück.

**2. Geschlecht:**  männlich  weiblich

**3. Wie alt sind Sie?**

- |                                      |                                     |
|--------------------------------------|-------------------------------------|
| <input type="radio"/> unter 35 Jahre | <input type="radio"/> 50 - 54 Jahre |
| <input type="radio"/> 35 - 39 Jahre  | <input type="radio"/> 55 - 59 Jahre |
| <input type="radio"/> 40 - 44 Jahre  | <input type="radio"/> 60 - 64 Jahre |
| <input type="radio"/> 45 - 49 Jahre  | <input type="radio"/> über 65 Jahre |

**4. Wann haben Sie Ihr Staatsexamen gemacht?**

- vor 1960  1960 - 69  1970 - 79  1980 - 89  1990 - 99  2000 oder später

**5. Wo haben Sie ihr Staatsexamen gemacht?**

- in der Deutschschweiz  
 in der Romandie  
 ausserhalb der Schweiz

**6. Dauer der beruflichen Tätigkeit zwischen Staatsexamen und Praxiseröffnung:**

- unter 3 Jahre  3 - 5 Jahre  6 - 9 Jahre  10 + Jahre

**7. Wie lautet Ihr FMH-Titel (Haupttitel)?**

- Ich habe keinen FMH-Titel  
 Allgemeine Medizin  
 Innere Medizin  
 Allgemeine Innere Medizin  
 Anderes \_\_\_\_\_  
 Zusatztitel, Fähigkeitsnachweise: \_\_\_\_\_

**8. Haben Sie eine spezifische Weiterbildung in Palliativmedizin absolviert?**

- Ja  Nein

Falls ja, welche: \_\_\_\_\_

Dauer der Weiterbildung: \_\_\_\_\_

**9. Wo liegt Ihre Praxis?**

Bitte geben Sie sowohl die Einwohnerzahl als auch die Region an.

**Einwohnerzahl in Ihrer Ortschaft**

- bis 25.000 Einwohner
- 25.000 bis 50.000 Einwohner
- 50.000 bis 100.000 Einwohner
- über 100.000 Einwohner

**Region:**

Bitte kreuzen Sie hier die für Ihren Praxisstandort am ehesten zutreffende Antwort an.  
(keine Mehrfachnennung möglich)

- Stadt
- Agglomeration einer Stadt
- Ländliche Region
- Bergregion

**10. In welcher Art von Praxis arbeiten Sie? (Mehrfachnennung möglich)**

- Einzelpraxis
- Gruppenpraxis mit 2 - 3 Ärzten
- Gruppenpraxis mit > 3 Ärzten
- HMO-Praxis
- Angeschlossen an ein Managed Care-System (Ärztennetzwerk)

**11. Betreuen Sie neben Ihrer Praxistätigkeit auch Spitalpatienten/-patientinnen?**

- Ja
- Nein

**12. Wie üben Sie Ihre Tätigkeit aus?**

- Vorwiegend selbständig erwerbend
- Vorwiegend angestellt

**13. Zu wie vielen Stellenprozenten haben Sie *im Jahr 2013* durchschnittlich als Hausarzt/Hausärztin gearbeitet?**

\_\_\_ %

**14. Wie viele Konsultationen halten Sie durchschnittlich pro Halbtage ab?**

\_\_\_ Konsultationen/Halbtage

**15. Wie viele Besuche machen Sie durchschnittlich pro Monat (Hausbesuche, Alters-Pflegeheim, Behindertenheim etc.)?**

(Falls Sie in einem Alters- und Pflegeheim im Rahmen eines Besuchs z.B. 10 Pensionäre sehen, geben Sie bitte **einen Besuch** und **zehn Konsultationen** an)

\_\_\_ Besuche/Monat

\_\_\_ Konsultationen/Monat

**16. Wie viele Ihrer Patienten/Patientinnen sind im Jahr 2013 verstorben?**

|                                                                                                                                                                         |                         |                             |                              |                           |
|-------------------------------------------------------------------------------------------------------------------------------------------------------------------------|-------------------------|-----------------------------|------------------------------|---------------------------|
| A. <b>Plötzlich oder nach sehr kurzer Krankheit</b> , also innert 1 bis 4 Wochen, ohne vorbestehende schwere Erkrankung, beispielsweise nach akuter Meningitis, Unfall. | <input type="radio"/> 0 | <input type="radio"/> 1 - 5 | <input type="radio"/> 6 - 15 | <input type="radio"/> 16+ |
| B. <b>Nach einer längeren Krankheit (über einen Monat)</b> , beispielsweise nach Tumor, Demenz, COPD, Herzinsuffizienz, ALS.                                            | <input type="radio"/> 0 | <input type="radio"/> 1 - 5 | <input type="radio"/> 6 - 15 | <input type="radio"/> 16+ |

**17. Bei wie viele Ihrer Patienten/Patientinnen, die im Jahr 2013 ...**

|                                                                                                                                                                                                               |                         |                             |                              |                           |
|---------------------------------------------------------------------------------------------------------------------------------------------------------------------------------------------------------------|-------------------------|-----------------------------|------------------------------|---------------------------|
| <b>...nach einem Tumorleiden</b> verstorben sind, waren Sie <b>in den letzten 2 Wochen</b> ihres Lebens die medizinische Hauptbetreuungsperson?                                                               | <input type="radio"/> 0 | <input type="radio"/> 1 - 5 | <input type="radio"/> 6 - 15 | <input type="radio"/> 16+ |
| <b>...nach einem Nichttumorleiden</b> verstorben sind (wie beispielsweise COPD, Herzinsuffizienz, ALS, Demenz), waren Sie <b>in den letzten 2 Wochen</b> ihres Lebens die medizinische Hauptbetreuungsperson? | <input type="radio"/> 0 | <input type="radio"/> 1 - 5 | <input type="radio"/> 6 - 15 | <input type="radio"/> 16+ |

**18. Wie oft wurden Ihre Patienten/Patientinnen im Jahre 2013 *in den letzten 1 bis 3 Lebenswochen vor dem Tode* verlegt?**

gar nicht (bitte weiter zu Frage 25)

| A. Vom Pflegeheim              | sehr häufig           | häufig                | manchmal              | selten                | nie                   |
|--------------------------------|-----------------------|-----------------------|-----------------------|-----------------------|-----------------------|
| ins Akut- oder Geriatriespital | <input type="radio"/> | <input type="radio"/> | <input type="radio"/> | <input type="radio"/> | <input type="radio"/> |
| nach Hause                     | <input type="radio"/> | <input type="radio"/> | <input type="radio"/> | <input type="radio"/> | <input type="radio"/> |
| in eine Palliativeinrichtung   | <input type="radio"/> | <input type="radio"/> | <input type="radio"/> | <input type="radio"/> | <input type="radio"/> |

| B) Vom Akut- oder Geriatriespital | sehr häufig           | häufig                | manchmal              | selten                | nie                   |
|-----------------------------------|-----------------------|-----------------------|-----------------------|-----------------------|-----------------------|
| nach Hause                        | <input type="radio"/> | <input type="radio"/> | <input type="radio"/> | <input type="radio"/> | <input type="radio"/> |
| in ein Pflegeheim                 | <input type="radio"/> | <input type="radio"/> | <input type="radio"/> | <input type="radio"/> | <input type="radio"/> |
| in eine Palliativeinrichtung      | <input type="radio"/> | <input type="radio"/> | <input type="radio"/> | <input type="radio"/> | <input type="radio"/> |

| C) Von Zuhause                    | sehr häufig           | häufig                | manchmal              | selten                | nie                   |
|-----------------------------------|-----------------------|-----------------------|-----------------------|-----------------------|-----------------------|
| in ein Akut- oder Geriatriespital | <input type="radio"/> | <input type="radio"/> | <input type="radio"/> | <input type="radio"/> | <input type="radio"/> |
| in ein Pflegeheim                 | <input type="radio"/> | <input type="radio"/> | <input type="radio"/> | <input type="radio"/> | <input type="radio"/> |
| in eine Palliativeinrichtung      | <input type="radio"/> | <input type="radio"/> | <input type="radio"/> | <input type="radio"/> | <input type="radio"/> |

**19. Was waren Gründe für diese Verlegungen? (Bitte alle aufgeführten Gründe bewerten)**

| Gründe                                   | sehr häufig           | häufig                | manchmal              | selten                | nie                   |
|------------------------------------------|-----------------------|-----------------------|-----------------------|-----------------------|-----------------------|
| Zu schwierige Symptomkontrolle           | <input type="radio"/> | <input type="radio"/> | <input type="radio"/> | <input type="radio"/> | <input type="radio"/> |
| Zu kleines oder fehlendes Betreuungsnetz | <input type="radio"/> | <input type="radio"/> | <input type="radio"/> | <input type="radio"/> | <input type="radio"/> |
| Erschöpfung des Betreuungsnetzes         | <input type="radio"/> | <input type="radio"/> | <input type="radio"/> | <input type="radio"/> | <input type="radio"/> |
| Wunsch des Patienten/der Patientin       | <input type="radio"/> | <input type="radio"/> | <input type="radio"/> | <input type="radio"/> | <input type="radio"/> |
| Wunsch der Angehörigen                   | <input type="radio"/> | <input type="radio"/> | <input type="radio"/> | <input type="radio"/> | <input type="radio"/> |
| Fehlende Ressourcen der Hausärzte/-innen | <input type="radio"/> | <input type="radio"/> | <input type="radio"/> | <input type="radio"/> | <input type="radio"/> |
| Finanzielle Gründe                       | <input type="radio"/> | <input type="radio"/> | <input type="radio"/> | <input type="radio"/> | <input type="radio"/> |

**Qualität der Betreuung am Lebensende****20. Bitte geben Sie an, inwiefern die folgenden Aussagen für Sie zutreffen.  
Ich denke, dass ...**

|                                                                                                                                                                                                  | trifft völlig zu      | trifft über-<br>wiegend zu | trifft<br>teilweise zu | trifft eher<br>nicht zu | trifft gar<br>nicht zu |
|--------------------------------------------------------------------------------------------------------------------------------------------------------------------------------------------------|-----------------------|----------------------------|------------------------|-------------------------|------------------------|
| A. ... ich in meiner <b>Ausbildung</b> (Medizinstudium) zu Aspekten der Palliativmedizin ausreichend ausgebildet wurde.                                                                          | <input type="radio"/> | <input type="radio"/>      | <input type="radio"/>  | <input type="radio"/>   | <input type="radio"/>  |
| B. .... ich in meiner <b>Weiterbildung</b> (Zeit bis zum Facharzttitle) auf dem Gebiet der Palliativmedizin im Hinblick auf meine spätere hausärztliche Tätigkeit ausreichend vorbereitet wurde. | <input type="radio"/> | <input type="radio"/>      | <input type="radio"/>  | <input type="radio"/>   | <input type="radio"/>  |
| C. ... die <b>universitäre Ausbildung und eine internistische Weiterbildung</b> ausreichen, um später kompetent palliativmedizinisch tätig zu sein.                                              | <input type="radio"/> | <input type="radio"/>      | <input type="radio"/>  | <input type="radio"/>   | <input type="radio"/>  |
| D. ... das Fortbildungsangebot in meiner Region auf dem Gebiet der Palliativmedizin ausreichend ist.                                                                                             | <input type="radio"/> | <input type="radio"/>      | <input type="radio"/>  | <input type="radio"/>   | <input type="radio"/>  |

**21. Welche Qualitätsmerkmale sind aus Ihrer Sicht für eine gute palliativmedizinische Versorgung wichtig? Bitte gewichten Sie die folgenden Qualitätsmerkmale aus Ihrer ganz persönlichen Perspektive.**

|                                                                                         | sehr wichtig          | wichtig               | teilweise wichtig     | eher unwichtig        | unwichtig             |
|-----------------------------------------------------------------------------------------|-----------------------|-----------------------|-----------------------|-----------------------|-----------------------|
| A. Erkennen / Behandeln von Schmerzen                                                   | <input type="radio"/> | <input type="radio"/> | <input type="radio"/> | <input type="radio"/> | <input type="radio"/> |
| B. Erkennen / Behandeln von Nausea, Erbrechen                                           | <input type="radio"/> | <input type="radio"/> | <input type="radio"/> | <input type="radio"/> | <input type="radio"/> |
| C. Erkennen / Behandeln von Obstipation, Ileus                                          | <input type="radio"/> | <input type="radio"/> | <input type="radio"/> | <input type="radio"/> | <input type="radio"/> |
| D. Erkennen / Behandeln von Unruhe, Delir                                               | <input type="radio"/> | <input type="radio"/> | <input type="radio"/> | <input type="radio"/> | <input type="radio"/> |
| E. Erkennen / Behandeln von Angst, Depression                                           | <input type="radio"/> | <input type="radio"/> | <input type="radio"/> | <input type="radio"/> | <input type="radio"/> |
| F. Ernährungsberatung                                                                   | <input type="radio"/> | <input type="radio"/> | <input type="radio"/> | <input type="radio"/> | <input type="radio"/> |
| G. Angehörigenbetreuung                                                                 | <input type="radio"/> | <input type="radio"/> | <input type="radio"/> | <input type="radio"/> | <input type="radio"/> |
| H. Umgang mit Verlust und Trauer                                                        | <input type="radio"/> | <input type="radio"/> | <input type="radio"/> | <input type="radio"/> | <input type="radio"/> |
| I. Kommunikative Kompetenz                                                              | <input type="radio"/> | <input type="radio"/> | <input type="radio"/> | <input type="radio"/> | <input type="radio"/> |
| J. Kompetenz in Entscheidungen am Lebensende                                            | <input type="radio"/> | <input type="radio"/> | <input type="radio"/> | <input type="radio"/> | <input type="radio"/> |
| K. Beratung bezüglich Patientenverfügungen                                              | <input type="radio"/> | <input type="radio"/> | <input type="radio"/> | <input type="radio"/> | <input type="radio"/> |
| L. Adäquater Umgang mit Suizidwünschen                                                  | <input type="radio"/> | <input type="radio"/> | <input type="radio"/> | <input type="radio"/> | <input type="radio"/> |
| M. Adäquater Umgang mit Sterbewünschen                                                  | <input type="radio"/> | <input type="radio"/> | <input type="radio"/> | <input type="radio"/> | <input type="radio"/> |
| N. Umgang mit spirituellen Bedürfnissen                                                 | <input type="radio"/> | <input type="radio"/> | <input type="radio"/> | <input type="radio"/> | <input type="radio"/> |
| O. Palliative Betreuung von Menschen anderer Kulturkreise                               | <input type="radio"/> | <input type="radio"/> | <input type="radio"/> | <input type="radio"/> | <input type="radio"/> |
| P. Adäquater Umgang mit der eigenen emotionalen Belastung                               | <input type="radio"/> | <input type="radio"/> | <input type="radio"/> | <input type="radio"/> | <input type="radio"/> |
| Q. Vorwegnahme von Krisen (Antizipation)                                                | <input type="radio"/> | <input type="radio"/> | <input type="radio"/> | <input type="radio"/> | <input type="radio"/> |
| R. Bereitschaft zur Übernahme von Hausbesuchen und/oder Besuchen in Pflegeinstitutionen | <input type="radio"/> | <input type="radio"/> | <input type="radio"/> | <input type="radio"/> | <input type="radio"/> |
| S. Telefonische Erreichbarkeit rund um die Uhr                                          | <input type="radio"/> | <input type="radio"/> | <input type="radio"/> | <input type="radio"/> | <input type="radio"/> |
| T. Koordination einer vernetzten Versorgung                                             | <input type="radio"/> | <input type="radio"/> | <input type="radio"/> | <input type="radio"/> | <input type="radio"/> |
| U. Weitere, nämlich:                                                                    | <input type="radio"/> | <input type="radio"/> | <input type="radio"/> | <input type="radio"/> | <input type="radio"/> |

| <b>22. In welchen Bereichen fühlen Sie sich sicher beziehungsweise unsicher?</b> |                                                        |                       |                       |                       |                       |                       |                       |
|----------------------------------------------------------------------------------|--------------------------------------------------------|-----------------------|-----------------------|-----------------------|-----------------------|-----------------------|-----------------------|
|                                                                                  | sehr<br>sicher                                         | sicher                | teilweise<br>sicher   | eher<br>unsicher      | unsicher              | kommt<br>nicht vor    |                       |
| A.                                                                               | Erkennen / Behandeln von Schmerzen                     | <input type="radio"/> | <input type="radio"/> | <input type="radio"/> | <input type="radio"/> | <input type="radio"/> | <input type="radio"/> |
| B.                                                                               | Erkennen / Behandeln von Nausea, Erbrechen             | <input type="radio"/> | <input type="radio"/> | <input type="radio"/> | <input type="radio"/> | <input type="radio"/> | <input type="radio"/> |
| C.                                                                               | Erkennen / Behandeln von Obstipation, Ileus            | <input type="radio"/> | <input type="radio"/> | <input type="radio"/> | <input type="radio"/> | <input type="radio"/> | <input type="radio"/> |
| D.                                                                               | Erkennen / Behandeln von Unruhe, Delir                 | <input type="radio"/> | <input type="radio"/> | <input type="radio"/> | <input type="radio"/> | <input type="radio"/> | <input type="radio"/> |
| E.                                                                               | Erkennen / Behandeln von Angst, Depression             | <input type="radio"/> | <input type="radio"/> | <input type="radio"/> | <input type="radio"/> | <input type="radio"/> | <input type="radio"/> |
| F.                                                                               | Ernährungsberatung                                     | <input type="radio"/> | <input type="radio"/> | <input type="radio"/> | <input type="radio"/> | <input type="radio"/> | <input type="radio"/> |
| G.                                                                               | Pädiatrische Palliative Care                           | <input type="radio"/> | <input type="radio"/> | <input type="radio"/> | <input type="radio"/> | <input type="radio"/> | <input type="radio"/> |
| H.                                                                               | Geriatrische Palliativ Care                            | <input type="radio"/> | <input type="radio"/> | <input type="radio"/> | <input type="radio"/> | <input type="radio"/> | <input type="radio"/> |
| I.                                                                               | Angehörigenbetreuung                                   | <input type="radio"/> | <input type="radio"/> | <input type="radio"/> | <input type="radio"/> | <input type="radio"/> | <input type="radio"/> |
| J.                                                                               | Umgang mit Verlust und Trauer                          | <input type="radio"/> | <input type="radio"/> | <input type="radio"/> | <input type="radio"/> | <input type="radio"/> | <input type="radio"/> |
| K.                                                                               | Kommunikation                                          | <input type="radio"/> | <input type="radio"/> | <input type="radio"/> | <input type="radio"/> | <input type="radio"/> | <input type="radio"/> |
| L.                                                                               | Entscheidungen am Lebensende                           | <input type="radio"/> | <input type="radio"/> | <input type="radio"/> | <input type="radio"/> | <input type="radio"/> | <input type="radio"/> |
| M.                                                                               | Patientenverfügung                                     | <input type="radio"/> | <input type="radio"/> | <input type="radio"/> | <input type="radio"/> | <input type="radio"/> | <input type="radio"/> |
| N.                                                                               | Umgang mit Suizidwünschen                              | <input type="radio"/> | <input type="radio"/> | <input type="radio"/> | <input type="radio"/> | <input type="radio"/> | <input type="radio"/> |
| O.                                                                               | Umgang mit Sterbewünschen                              | <input type="radio"/> | <input type="radio"/> | <input type="radio"/> | <input type="radio"/> | <input type="radio"/> | <input type="radio"/> |
| P.                                                                               | Umgang mit spirituellen Bedürfnissen                   | <input type="radio"/> | <input type="radio"/> | <input type="radio"/> | <input type="radio"/> | <input type="radio"/> | <input type="radio"/> |
| Q.                                                                               | Palliative Betreuung von Menschen anderer Kulturkreise | <input type="radio"/> | <input type="radio"/> | <input type="radio"/> | <input type="radio"/> | <input type="radio"/> | <input type="radio"/> |
| R.                                                                               | Umgang mit der eigenen emotionalen Belastung           | <input type="radio"/> | <input type="radio"/> | <input type="radio"/> | <input type="radio"/> | <input type="radio"/> | <input type="radio"/> |
| S.                                                                               | Vorwegnahme von Krisen (Antizipation)                  | <input type="radio"/> | <input type="radio"/> | <input type="radio"/> | <input type="radio"/> | <input type="radio"/> | <input type="radio"/> |
| T.                                                                               | Koordination einer vernetzten Versorgung               | <input type="radio"/> | <input type="radio"/> | <input type="radio"/> | <input type="radio"/> | <input type="radio"/> | <input type="radio"/> |
| U.                                                                               | Weitere:                                               | <input type="radio"/> | <input type="radio"/> | <input type="radio"/> | <input type="radio"/> | <input type="radio"/> | <input type="radio"/> |

**23. Bitte bewerten Sie folgende Aussagen für Ihre Region:**

|    |                                                                                                                                                          | trifft völlig zu      | trifft überwiegend zu | trifft teilweise zu   | trifft eher nicht zu  | trifft gar nicht zu   |
|----|----------------------------------------------------------------------------------------------------------------------------------------------------------|-----------------------|-----------------------|-----------------------|-----------------------|-----------------------|
| A. | Die generelle Qualität der medizinischen Versorgung am Lebensende erachte ich als gut.                                                                   | <input type="radio"/> | <input type="radio"/> | <input type="radio"/> | <input type="radio"/> | <input type="radio"/> |
| B. | Die palliativmedizinische Betreuung von sterbenden Patienten/Patientinnen zu Hause ist von guter Qualität.                                               | <input type="radio"/> | <input type="radio"/> | <input type="radio"/> | <input type="radio"/> | <input type="radio"/> |
| C. | Die palliativmedizinische Betreuung von sterbenden Patienten/Patientinnen im Alters-/Pflegeheim ist von guter Qualität.                                  | <input type="radio"/> | <input type="radio"/> | <input type="radio"/> | <input type="radio"/> | <input type="radio"/> |
| D. | Kranke Personen und Angehörige haben zu spät Zugang zur medizinischen Versorgung am Lebensende.                                                          | <input type="radio"/> | <input type="radio"/> | <input type="radio"/> | <input type="radio"/> | <input type="radio"/> |
| E. | Es bestehen genügend Versorgungsnetze, um Patienten/Patientinnen bis zum Lebensende zu Hause betreuen zu können.                                         | <input type="radio"/> | <input type="radio"/> | <input type="radio"/> | <input type="radio"/> | <input type="radio"/> |
| F. | Die Mehrheit der Patienten/Patientinnen verstirbt in der von ihnen bevorzugten Umgebung (zu Hause, Spital, Alters-Pflegeheim, Palliativstation, Hospiz). | <input type="radio"/> | <input type="radio"/> | <input type="radio"/> | <input type="radio"/> | <input type="radio"/> |
| G. | Haus-, Spezial- und Spitalärzte ziehen bei Patienten /Patientinnen am Lebensende nicht immer am gleichen Strick.                                         | <input type="radio"/> | <input type="radio"/> | <input type="radio"/> | <input type="radio"/> | <input type="radio"/> |

**Voraussetzungen für die Betreuung am Lebensende****24. Welche Gründe könnten Ihrer Meinung nach dazu führen, dass Sie einen Palliativpatienten/eine Palliativpatientin nicht mehr weiter betreuen und einen Kollegen / eine Kollegin (Palliativmediziner/Palliativmedizinerin, Spezialarzt/Spezialärztin) oder eine Institution anfragen, die Betreuung des Patienten zu übernehmen?**

|    |                                                                     | trifft völlig zu      | trifft überwiegend zu | trifft teilweise zu   | trifft eher nicht zu  | trifft gar nicht zu   |
|----|---------------------------------------------------------------------|-----------------------|-----------------------|-----------------------|-----------------------|-----------------------|
| A. | Zeitmangel                                                          | <input type="radio"/> | <input type="radio"/> | <input type="radio"/> | <input type="radio"/> | <input type="radio"/> |
| B. | Unbefriedigende Bezahlung                                           | <input type="radio"/> | <input type="radio"/> | <input type="radio"/> | <input type="radio"/> | <input type="radio"/> |
| C. | Unvereinbarkeit mit anderen Verpflichtungen                         | <input type="radio"/> | <input type="radio"/> | <input type="radio"/> | <input type="radio"/> | <input type="radio"/> |
| D. | Weil andere Fachpersonen besser für diese Aufgabe ausgebildet sind. | <input type="radio"/> | <input type="radio"/> | <input type="radio"/> | <input type="radio"/> | <input type="radio"/> |
| E. | Weil ich keine Hausbesuche anbieten kann.                           | <input type="radio"/> | <input type="radio"/> | <input type="radio"/> | <input type="radio"/> | <input type="radio"/> |
| F. | Weil ich mich zu wenig unterstützt fühle.                           | <input type="radio"/> | <input type="radio"/> | <input type="radio"/> | <input type="radio"/> | <input type="radio"/> |
| G. | Weil die eigene emotionale Belastung zu gross ist                   | <input type="radio"/> | <input type="radio"/> | <input type="radio"/> | <input type="radio"/> | <input type="radio"/> |



**25. Inwiefern treffen folgende Aussagen auf Sie zu?**

|                                                                                                                                                         | trifft völlig zu      | trifft überwiegend zu | trifft teilweise zu   | trifft eher nicht zu  | trifft gar nicht zu   |
|---------------------------------------------------------------------------------------------------------------------------------------------------------|-----------------------|-----------------------|-----------------------|-----------------------|-----------------------|
| A. Ich empfinde die Betreuung und Begleitung von sterbenden Menschen und ihren Angehörigen als eine befriedigende Aufgabe.                              | <input type="radio"/> | <input type="radio"/> | <input type="radio"/> | <input type="radio"/> | <input type="radio"/> |
| B. Ich fühle mich durch die Betreuung von sterbenden Menschen emotional belastet.                                                                       | <input type="radio"/> | <input type="radio"/> | <input type="radio"/> | <input type="radio"/> | <input type="radio"/> |
| C. Ich habe ausreichend Möglichkeiten, mich bei palliativmedizinischen Fragen mit Kollegen/ Kolleginnen zu besprechen (Balint-Gruppe, Qualitätszirkel). | <input type="radio"/> | <input type="radio"/> | <input type="radio"/> | <input type="radio"/> | <input type="radio"/> |

**Versorgungsstrukturen****26. Befindet sich im Einzugsgebiet Ihrer Praxis ein Hospiz, eine Palliativstation oder eine Palliativklinik?**

- Ja     Nein     Weiss ich nicht

**27. Haben Sie die Möglichkeit, mit einer spezialisierten Spitex zusammenzuarbeiten (beispielsweise onkologische Spitex, mobiles Palliative Care Team)?**

- Ja     Nein     Weiss ich nicht

**28. Nutzen Sie in Ihrem ärztlichen Alltag palliativmedizinische Konsilien (telefonisch oder am Krankenbett), beispielsweise mit spezialisierter Spitex, Palliativmediziner/-innen. Geriater/innen?**

- Ja  
 Bedarf vorhanden, aber Dienste nicht verfügbar  
 Meines Erachtens nicht notwendig

**29. Inwiefern stimmen Sie folgende Aussagen zu?**

|                                                                                                                                                                                                                             | stimme völlig zu      | stimme überwiegend zu | stimme teilweise zu   | stimme eher nicht zu  | stimme gar nicht zu   |
|-----------------------------------------------------------------------------------------------------------------------------------------------------------------------------------------------------------------------------|-----------------------|-----------------------|-----------------------|-----------------------|-----------------------|
| A. Die medizinische Betreuung am Lebensende sollte generell den <b>Hausärzten/-ärztinnen</b> übertragen werden.                                                                                                             | <input type="radio"/> | <input type="radio"/> | <input type="radio"/> | <input type="radio"/> | <input type="radio"/> |
| B. Die medizinische Betreuung am Lebensende sollte von den jeweils <b>involvierten Fachärzten/-ärztinnen</b> übernommen werden (zum Beispiel von Onkologen/Onkologinnen).                                                   | <input type="radio"/> | <input type="radio"/> | <input type="radio"/> | <input type="radio"/> | <input type="radio"/> |
| C. Die medizinische Betreuung am Lebensende sollte im Prinzip den <b>Hausärzten/-ärztinnen</b> übertragen werden. Wünschenswert ist die Möglichkeit der Unterstützung durch Palliativmediziner/-innen für schwierige Fälle. | <input type="radio"/> | <input type="radio"/> | <input type="radio"/> | <input type="radio"/> | <input type="radio"/> |

**30. Bitte bewerten Sie nachfolgende Aussagen aus Ihrer persönlichen Perspektive.**

|                                                                                                                                                           | stimme zu             | stimme eher zu        | stimme teilweise zu   | stimme eher nicht zu  | stimme gar nicht zu   |
|-----------------------------------------------------------------------------------------------------------------------------------------------------------|-----------------------|-----------------------|-----------------------|-----------------------|-----------------------|
| A. Angehörige übernehmen in der Versorgung am Lebensende wichtige psychosoziale und pflegerische Funktionen.                                              | <input type="radio"/> | <input type="radio"/> | <input type="radio"/> | <input type="radio"/> | <input type="radio"/> |
| B. Eine umfassende palliativmedizinische Versorgung zu Hause bringt oft hohe Kosten für den Patienten/ die Patientin und seine/ihre Angehörigen mit sich. | <input type="radio"/> | <input type="radio"/> | <input type="radio"/> | <input type="radio"/> | <input type="radio"/> |
| C. Die finanzielle Belastung eines Patienten/ einer Patientin am Lebensende kann so hoch sein, dass eine Betreuung zu Hause nicht mehr möglich ist.       | <input type="radio"/> | <input type="radio"/> | <input type="radio"/> | <input type="radio"/> | <input type="radio"/> |
| D. Angehörige und Patienten/Patientinnen sind bezüglich ihrer Möglichkeiten, finanzielle Unterstützungsangebote wahrzunehmen, gut informiert.             | <input type="radio"/> | <input type="radio"/> | <input type="radio"/> | <input type="radio"/> | <input type="radio"/> |
| E. Angehörige und Patienten/Patientinnen sind bezüglich ihrer Möglichkeiten, ambulante Pflegeangebote wahrzunehmen, gut informiert.                       | <input type="radio"/> | <input type="radio"/> | <input type="radio"/> | <input type="radio"/> | <input type="radio"/> |
| F. Ein Casemanager/eine Casemanagerin sollte die Koordination der Dienstleistungen für Patienten/ Patientinnen am Lebensende übernehmen.                  | <input type="radio"/> | <input type="radio"/> | <input type="radio"/> | <input type="radio"/> | <input type="radio"/> |

**31. Meiner Erfahrung nach ...**

|                                                                                                                                                                                                      | trifft völlig zu      | trifft überwiegend zu | trifft teilweise zu   | trifft eher nicht zu  | trifft gar nicht zu   |
|------------------------------------------------------------------------------------------------------------------------------------------------------------------------------------------------------|-----------------------|-----------------------|-----------------------|-----------------------|-----------------------|
| A. ...muss ich seit Einführung des Fallkostenpauschalen-Systems (DRG) in den Schweizer Spitälern vermehrt Patienten/Patientinnen am Lebensende zu Hause betreuen.                                    | <input type="radio"/> | <input type="radio"/> | <input type="radio"/> | <input type="radio"/> | <input type="radio"/> |
| B. ...kommt es seit Einführung des Fallkostenpauschalen-Systems (DRG) häufiger dazu, dass ich Patienten/Patientinnen am Lebensende kurz nach ihrer Entlassung wieder in eine Klinik überweisen muss. | <input type="radio"/> | <input type="radio"/> | <input type="radio"/> | <input type="radio"/> | <input type="radio"/> |
| C. ...hat die Umstellung der Spitäler auf das Fallpauschalen-System keinen Einfluss auf den <b>Betreuungsort</b> meiner Patienten/Patientinnen am Lebensende.                                        | <input type="radio"/> | <input type="radio"/> | <input type="radio"/> | <input type="radio"/> | <input type="radio"/> |
| D. ...hat die Umstellung der Spitäler auf das Fallpauschalen-System keinen Einfluss auf die <b>Betreuungsqualität</b> meiner Patienten/Patientinnen am Lebensende.                                   | <input type="radio"/> | <input type="radio"/> | <input type="radio"/> | <input type="radio"/> | <input type="radio"/> |

### Zusammenarbeit mit anderen Medizinalpersonen und Nicht-Medizinalpersonen

**32. Bitte gewichten Sie die Zusammenarbeit mit folgenden Akteuren bei der Versorgung von Palliativpatienten / - patientinnen. Geben Sie dabei an, welche Akteure Sie dabei als wichtig und welche Sie als eher weniger wichtig einstufen:**

|                                                                                                                     | sehr wichtig          | wichtig               | teilweise wichtig     | eher unwichtig        | unwichtig             |
|---------------------------------------------------------------------------------------------------------------------|-----------------------|-----------------------|-----------------------|-----------------------|-----------------------|
| A. Für das Fachgebiet zuständige Spezialärzte/ärztinnen (z.B. aus der Onkologie, Neurologie)                        | <input type="radio"/> | <input type="radio"/> | <input type="radio"/> | <input type="radio"/> | <input type="radio"/> |
| B. Allgemeine Spitex                                                                                                | <input type="radio"/> | <input type="radio"/> | <input type="radio"/> | <input type="radio"/> | <input type="radio"/> |
| C. Spezialisierte Spitex z.B. onkologische Spitex                                                                   | <input type="radio"/> | <input type="radio"/> | <input type="radio"/> | <input type="radio"/> | <input type="radio"/> |
| D. Mobiles Palliative Care-Team (interdisziplinär, mindestens mit Palliativmediziner/in und spezialisierter Pflege) | <input type="radio"/> | <input type="radio"/> | <input type="radio"/> | <input type="radio"/> | <input type="radio"/> |
| E. Palliativmediziner/in                                                                                            | <input type="radio"/> | <input type="radio"/> | <input type="radio"/> | <input type="radio"/> | <input type="radio"/> |
| F. Pflegende Angehörige                                                                                             | <input type="radio"/> | <input type="radio"/> | <input type="radio"/> | <input type="radio"/> | <input type="radio"/> |
| G. Akutspital in der Region                                                                                         | <input type="radio"/> | <input type="radio"/> | <input type="radio"/> | <input type="radio"/> | <input type="radio"/> |
| H. Geriatriespital in der Region                                                                                    | <input type="radio"/> | <input type="radio"/> | <input type="radio"/> | <input type="radio"/> | <input type="radio"/> |
| I. Alters-Pflegeheim                                                                                                | <input type="radio"/> | <input type="radio"/> | <input type="radio"/> | <input type="radio"/> | <input type="radio"/> |
| J. Hospiz (Pflegeheimstatus)                                                                                        | <input type="radio"/> | <input type="radio"/> | <input type="radio"/> | <input type="radio"/> | <input type="radio"/> |
| K. Palliativstation oder Palliativklinik                                                                            | <input type="radio"/> | <input type="radio"/> | <input type="radio"/> | <input type="radio"/> | <input type="radio"/> |
| L. Krebsliga                                                                                                        | <input type="radio"/> | <input type="radio"/> | <input type="radio"/> | <input type="radio"/> | <input type="radio"/> |
| M. Weitere Ligen und Patientenorganisationen für Demenz, Muskelerkrankungen, Rheuma u.a.                            | <input type="radio"/> | <input type="radio"/> | <input type="radio"/> | <input type="radio"/> | <input type="radio"/> |
| N. Physiotherapeuten/innen                                                                                          | <input type="radio"/> | <input type="radio"/> | <input type="radio"/> | <input type="radio"/> | <input type="radio"/> |
| O. Kunsttherapeuten (Musik-, Maltherapeuten)                                                                        | <input type="radio"/> | <input type="radio"/> | <input type="radio"/> | <input type="radio"/> | <input type="radio"/> |
| P. Seelsorger/ Seelsorgerinnen                                                                                      | <input type="radio"/> | <input type="radio"/> | <input type="radio"/> | <input type="radio"/> | <input type="radio"/> |
| Q. Psychologen/Psychologinnen, Psychiater/innen                                                                     | <input type="radio"/> | <input type="radio"/> | <input type="radio"/> | <input type="radio"/> | <input type="radio"/> |
| R. Apotheker/innen                                                                                                  | <input type="radio"/> | <input type="radio"/> | <input type="radio"/> | <input type="radio"/> | <input type="radio"/> |
| S. Casemanager/innen                                                                                                | <input type="radio"/> | <input type="radio"/> | <input type="radio"/> | <input type="radio"/> | <input type="radio"/> |

## Entscheidungen am Lebensende

### 33. Bitte schätzen Sie, wie viele Ihrer Patienten/Patientinnen im Alter über 65 Jahren eine Patientenverfügung haben:

Anteil Patienten/Patientinnen über 65 Jahre mit Patientenverfügung

- bis 25%    26 - 50%    51 - 75%    75% +

### 34. In der Mehrzahl der Fälle wird das Thema Patientenverfügung angesprochen von ...

- mir  
 den Patienten/Patientinnen  
 den Angehörigen

### 35. Ich spreche mit meinen Patienten/Patientinnen in der Regel über eine Patientenverfügung, wenn...

|    |                                         | trifft völlig zu      | trifft überwiegend zu | trifft teilweise zu   | trifft eher nicht zu  | trifft gar nicht zu   |
|----|-----------------------------------------|-----------------------|-----------------------|-----------------------|-----------------------|-----------------------|
| A. | sie noch gesund sind.                   | <input type="radio"/> | <input type="radio"/> | <input type="radio"/> | <input type="radio"/> | <input type="radio"/> |
| B. | sie schwer erkrankt sind.               | <input type="radio"/> | <input type="radio"/> | <input type="radio"/> | <input type="radio"/> | <input type="radio"/> |
| C. | eine schwere Erkrankung fortschreitet.  | <input type="radio"/> | <input type="radio"/> | <input type="radio"/> | <input type="radio"/> | <input type="radio"/> |
| D. | sich die letzte Lebensphase abzeichnet. | <input type="radio"/> | <input type="radio"/> | <input type="radio"/> | <input type="radio"/> | <input type="radio"/> |

### 36. Ich erneuere Patientenverfügungen nach einer gewissen Zeit ...

- häufig (bei mehr als der Hälfte der Patienten/Patientinnen)  
 gelegentlich  
 selten  
 nie

### 37. Bitte bewerten Sie nachfolgende Aussagen aus Ihrer persönlichen Perspektive.

|    |                                                                                                                         | trifft völlig zu      | trifft überwiegend zu | trifft teilweise zu   | trifft eher nicht zu  | trifft gar nicht zu   |
|----|-------------------------------------------------------------------------------------------------------------------------|-----------------------|-----------------------|-----------------------|-----------------------|-----------------------|
| A. | Patientenverfügungen sind für mich eine wesentliche Hilfe bei der Entscheidungsfindung am Lebensende.                   | <input type="radio"/> | <input type="radio"/> | <input type="radio"/> | <input type="radio"/> | <input type="radio"/> |
| B. | Ich wäre froh, wenn ich häufiger auf Patientenverfügungen zurückgreifen könnte.                                         | <input type="radio"/> | <input type="radio"/> | <input type="radio"/> | <input type="radio"/> | <input type="radio"/> |
| C. | Patientenverfügungen sind hilfreich, weil sie den Angehörigen in Situationen am Lebensende Entscheidungsdruck abnehmen. | <input type="radio"/> | <input type="radio"/> | <input type="radio"/> | <input type="radio"/> | <input type="radio"/> |

**38. Bitte bewerten Sie nachfolgende Aussagen aus Ihrer persönlichen Perspektive.**

|    |                                                                                                                       | trifft völlig zu      | trifft überwiegend zu | trifft teilweise zu   | trifft eher nicht zu  | trifft gar nicht zu   |
|----|-----------------------------------------------------------------------------------------------------------------------|-----------------------|-----------------------|-----------------------|-----------------------|-----------------------|
| A. | Vor Entscheidungen am Lebensende spreche ich mich mit den Angehörigen ab.                                             | <input type="radio"/> | <input type="radio"/> | <input type="radio"/> | <input type="radio"/> | <input type="radio"/> |
| B. | Vor Entscheidungen am Lebensende spreche ich mich mit den involvierten Pflegenden der Spitex oder des Pflegeheims ab. | <input type="radio"/> | <input type="radio"/> | <input type="radio"/> | <input type="radio"/> | <input type="radio"/> |
| C. | Bei Entscheidungen am Lebensende im Spital werde ich mit einbezogen.                                                  | <input type="radio"/> | <input type="radio"/> | <input type="radio"/> | <input type="radio"/> | <input type="radio"/> |
| D. | Bei Entscheidungen am Lebensende im Spital würde ich als Hausarzt/Hausärztin gerne vermehrt mit einbezogen werden.    | <input type="radio"/> | <input type="radio"/> | <input type="radio"/> | <input type="radio"/> | <input type="radio"/> |

**Umgang mit Suizidwünschen****39. Von wievielen Patienten / Patientinnen wurden Sie in den letzten 3 Jahren in einer konkreten Situation auf einen assistierten Suizid angesprochen?**

\_\_\_\_\_ Anzahl Patienten/Patientinnen (Bitte Zahl angeben)

**40. Bitte kreuzen Sie an, welche Aussage Ihrer eigenen Haltung am nächsten kommt:**

|                                                                                                                                                                                  |                       |
|----------------------------------------------------------------------------------------------------------------------------------------------------------------------------------|-----------------------|
| A. Ich verstehe den Wunsch von Patienten/Patientinnen nach einem assistierten Suizid und ich würde sie dabei unterstützen und begleiten.                                         | <input type="radio"/> |
| B. Ich verstehe den Wunsch von Patienten/Patientinnen nach einem assistierten Suizid, aber ich würde den Patienten/ die Patientin an eine Sterbehilfe-Organisation weiterweisen. | <input type="radio"/> |
| C. Ich bin generell gegen assistierten Suizid und erkläre meinen Patienten/Patientinnen, dass meine ärztliche Aufgabe darin besteht, Leiden zu verringern und Leben zu schützen. | <input type="radio"/> |
| D. Andere, nämlich _____                                                                                                                                                         | <input type="radio"/> |

**41. Bitte bewerten Sie nachfolgende Aussagen aus Ihrer persönlichen Perspektive.**

|                                                                                                           | trifft völlig zu      | trifft überwiegend zu | trifft teilweise zu   | trifft eher nicht zu  | trifft gar nicht zu   |
|-----------------------------------------------------------------------------------------------------------|-----------------------|-----------------------|-----------------------|-----------------------|-----------------------|
| A. Suizidwünsche meiner Patienten/ Patientinnen sind für mich eine emotionale Belastung.                  | <input type="radio"/> | <input type="radio"/> | <input type="radio"/> | <input type="radio"/> | <input type="radio"/> |
| B. Suizidwünsche meiner Patienten/ Patientinnen verunsichern mich.                                        | <input type="radio"/> | <input type="radio"/> | <input type="radio"/> | <input type="radio"/> | <input type="radio"/> |
| C. Assistierter Suizid kann berechtigt sein, um einen unkontrollierten Suizid zu verhindern.              | <input type="radio"/> | <input type="radio"/> | <input type="radio"/> | <input type="radio"/> | <input type="radio"/> |
| D. Ich fühle mich kompetent, mit einem Suizidwunsch eines Patienten/ einer Patientin umzugehen.           | <input type="radio"/> | <input type="radio"/> | <input type="radio"/> | <input type="radio"/> | <input type="radio"/> |
| E. Ich kann mir vorstellen, das Barbiturat-Präparat für assistierten Suizid zu verschreiben (NaP-Rezept). | <input type="radio"/> | <input type="radio"/> | <input type="radio"/> | <input type="radio"/> | <input type="radio"/> |

**Perspektive der Patienten/Patientinnen****42. Welche Aspekte sind aus Ihrer Sicht für Patienten/Patientinnen und deren Angehörige am Lebensende wichtig?**

|                                                                                           | sehr wichtig          | wichtig               | teilweise wichtig     | eher unwichtig        | unwichtig             |
|-------------------------------------------------------------------------------------------|-----------------------|-----------------------|-----------------------|-----------------------|-----------------------|
| A. Symptomfreiheit                                                                        | <input type="radio"/> | <input type="radio"/> | <input type="radio"/> | <input type="radio"/> | <input type="radio"/> |
| B. Korrekte Aufklärung                                                                    | <input type="radio"/> | <input type="radio"/> | <input type="radio"/> | <input type="radio"/> | <input type="radio"/> |
| C. Mögliche Probleme und deren Lösungen frühzeitig zu besprechen                          | <input type="radio"/> | <input type="radio"/> | <input type="radio"/> | <input type="radio"/> | <input type="radio"/> |
| D. Von einem persönlichen Arzt/einer persönlichen Ärztin bis zum Tod begleitet zu werden. | <input type="radio"/> | <input type="radio"/> | <input type="radio"/> | <input type="radio"/> | <input type="radio"/> |
| E. Mit jemandem über Ängste sprechen zu können.                                           | <input type="radio"/> | <input type="radio"/> | <input type="radio"/> | <input type="radio"/> | <input type="radio"/> |
| F. Keine zu grosse Belastung für Angehörige zu sein.                                      | <input type="radio"/> | <input type="radio"/> | <input type="radio"/> | <input type="radio"/> | <input type="radio"/> |
| G. Entscheidungen am Lebensende selbst fällen zu können.                                  | <input type="radio"/> | <input type="radio"/> | <input type="radio"/> | <input type="radio"/> | <input type="radio"/> |
| H. Beachten spiritueller Bedürfnisse.                                                     | <input type="radio"/> | <input type="radio"/> | <input type="radio"/> | <input type="radio"/> | <input type="radio"/> |
| I. Pflege- und Sterbeort selbst wählen können.                                            | <input type="radio"/> | <input type="radio"/> | <input type="radio"/> | <input type="radio"/> | <input type="radio"/> |
| J. Beim Sterben nicht alleine zu sein.                                                    | <input type="radio"/> | <input type="radio"/> | <input type="radio"/> | <input type="radio"/> | <input type="radio"/> |

### Tarifgestaltung und Honorierung

#### 43. Bitte geben Sie an, wie weit Sie folgenden Aussagen zustimmen:

|                                                                                                                                                                                                                           | stimme zu             | stimme eher zu        | stimme teilweise zu   | stimme eher nicht zu  | stimme gar nicht zu   |
|---------------------------------------------------------------------------------------------------------------------------------------------------------------------------------------------------------------------------|-----------------------|-----------------------|-----------------------|-----------------------|-----------------------|
| A. Palliativmedizinische ärztliche Leistungen für Patienten/Patientinnen zu Hause sowie im Alters- und Pflegeheim können adäquat verrechnet werden.                                                                       | <input type="radio"/> | <input type="radio"/> | <input type="radio"/> | <input type="radio"/> | <input type="radio"/> |
| B. Dass palliativmedizinische ärztliche Leistungen nicht adäquat verrechnet werden können, könnte zu einer geringeren Bereitschaft führen, die palliativ-medizinische Betreuung von Patienten/Patientinnen zu übernehmen. | <input type="radio"/> | <input type="radio"/> | <input type="radio"/> | <input type="radio"/> | <input type="radio"/> |
| C. Rechnungen von verstorbenen Patienten/Patientinnen werden oftmals nicht bezahlt.                                                                                                                                       | <input type="radio"/> | <input type="radio"/> | <input type="radio"/> | <input type="radio"/> | <input type="radio"/> |

#### Kommentare:

Vielen herzlichen Dank!

Senden Sie den Fragebogen nun bitte mit dem vorfrankierten Kuvert an folgende Adresse zurück:

Frau Dipl. Soz. Ina C. Otte  
 Institut für Hausarztmedizin IHAMB?  
 Universität Basel  
 Petersgraben 4  
 4031 Basel
