# Supplementary material for: General Practitioners’ Attitudes towards Essential Competencies in End-of-Life Care: A Cross-Sectional Survey
Source: PLoS One. 2017 Feb 1;12(2):e0170168. doi: 10.1371/journal.pone.0170168 (PMC5287469; doi:10.1371/journal.pone.0170168)
Supplement: S2 Table — The descriptive statistic encompass number of valid cases (n), mean, standard deviation (sd), median (standard), minimum (min), maximum (max), skew, kurtosis, standard error (se). Furthermore, frequencies (percentages of responses in each category) for each response category are presented. (XLSX) [file pone.0170168.s005.xlsx]

## Sheet: Sheet1
	n	mean	sd	median	min	max	range	skew	kurtosis	se	Frequency_very_confident	Frequency_confident	Frequency_partially_confident	Frequency_rather_unconfident	Frequency_unconfident
Confidence_Pain	573	4.01396	0.576171	4	1	5	4	-0.437548	1.948	0.0240699	16.0279	70.2091	12.7178	0.696864	0.174216
Confidence_Nausea	573	3.96684	0.620695	4	1	5	4	-0.50399	1.44905	0.0259299	15.6794	66.899	15.6794	1.39373	0.174216
Confidence_Constipation	572	3.86014	0.668023	4	1	5	4	-0.642287	1.37719	0.0279314	12.5654	64.0489	20.2443	2.6178	0.34904
Confidence_Delir	571	3.69177	0.748977	4	1	5	4	-0.306815	0.13785	0.0313437	11.5183	51.3089	31.7627	4.71204	0.34904
Confidence_Depression	571	3.85814	0.702764	4	1	5	4	-0.401491	0.429407	0.0294097	15.1568	58.1882	23.1707	2.78746	0.174216
Confidence_Nutrition	567	2.95944	0.849097	3	1	5	4	-0.130519	-0.0222188	0.0356587	2.43478	21.7391	48.3478	21.5652	4.52174
Confidence_Relatives	572	3.86888	0.678886	4	1	5	4	-0.369847	0.71161	0.0283857	14.8342	59.1623	24.0838	1.39616	0.34904
Confidence_Grief	573	3.76091	0.699955	4	1	5	4	-0.336666	0.458842	0.0292411	11.6725	55.9233	29.2683	2.61324	0.348432
Confidence_Communication	574	3.98955	0.619544	4	1	5	4	-0.213206	0.578694	0.0258593	17.913	63.4783	18.087	0.173913	0.173913
Confidence_Decisions	573	3.7836	0.725613	4	1	5	4	-0.523826	0.921164	0.0303129	12.892	56.6202	26.8293	2.78746	0.696864
Confidence_Advance_Directives	574	3.8885	0.724616	4	1	5	4	-0.570384	0.955222	0.0302449	17.0435	58.2609	21.3913	2.6087	0.521739
Confidence_Suicidal_Wish	559	3.1288	0.975255	3	1	5	4	-0.270518	-0.256649	0.0412489	5.93368	29.4939	39.4415	16.5794	6.1082
Confidence_Wish_to_Die	570	3.49649	0.905454	4	1	5	4	-0.457518	0.076994	0.0379253	10.8202	42.7574	33.3333	10.1222	2.44328
Confidence_Spiritual	557	3.1167	1.06566	3	1	5	4	-0.330725	-0.517404	0.0451536	6.95652	31.4783	33.2174	16.3478	8.86957
Confidence_Culture	545	2.50275	1.01482	2	1	5	4	0.298017	-0.487761	0.0434702	2.61324	13.0662	29.7909	33.4495	16.0279
Confidence_Own_Emotional_Burden	570	3.68421	0.748939	4	1	5	4	-0.767132	1.25653	0.0313696	8.88502	57.1429	27.5261	4.52962	1.21951
Confidence_Crisis_Anticipation	571	3.34676	0.750838	3	1	5	4	-0.290003	0.411645	0.0314216	4	37.7391	47.6522	8.52174	1.3913
Confidence_Coordination_Healthcare_Networks	570	3.62456	0.792824	4	1	5	4	-0.559755	0.700661	0.0332077	9.96503	50.5245	32.3427	5.41958	1.3986
